# Supplementary material
Source: MDPI journal article supplement (https://www.mdpi.com/2072-4292/11/3/254)
Supplement: s1 [file s1]

*Supplementary material 1 for*

Continuous wavelet analysis of leaf reflectance improves classification

accuracy of mangroves species

Yi Xu, Junjie Wang\*, Anquan Xia, Kangyong Zhang,

Xuanyan Dong, Kaipeng Wu and Guofeng Wu\*

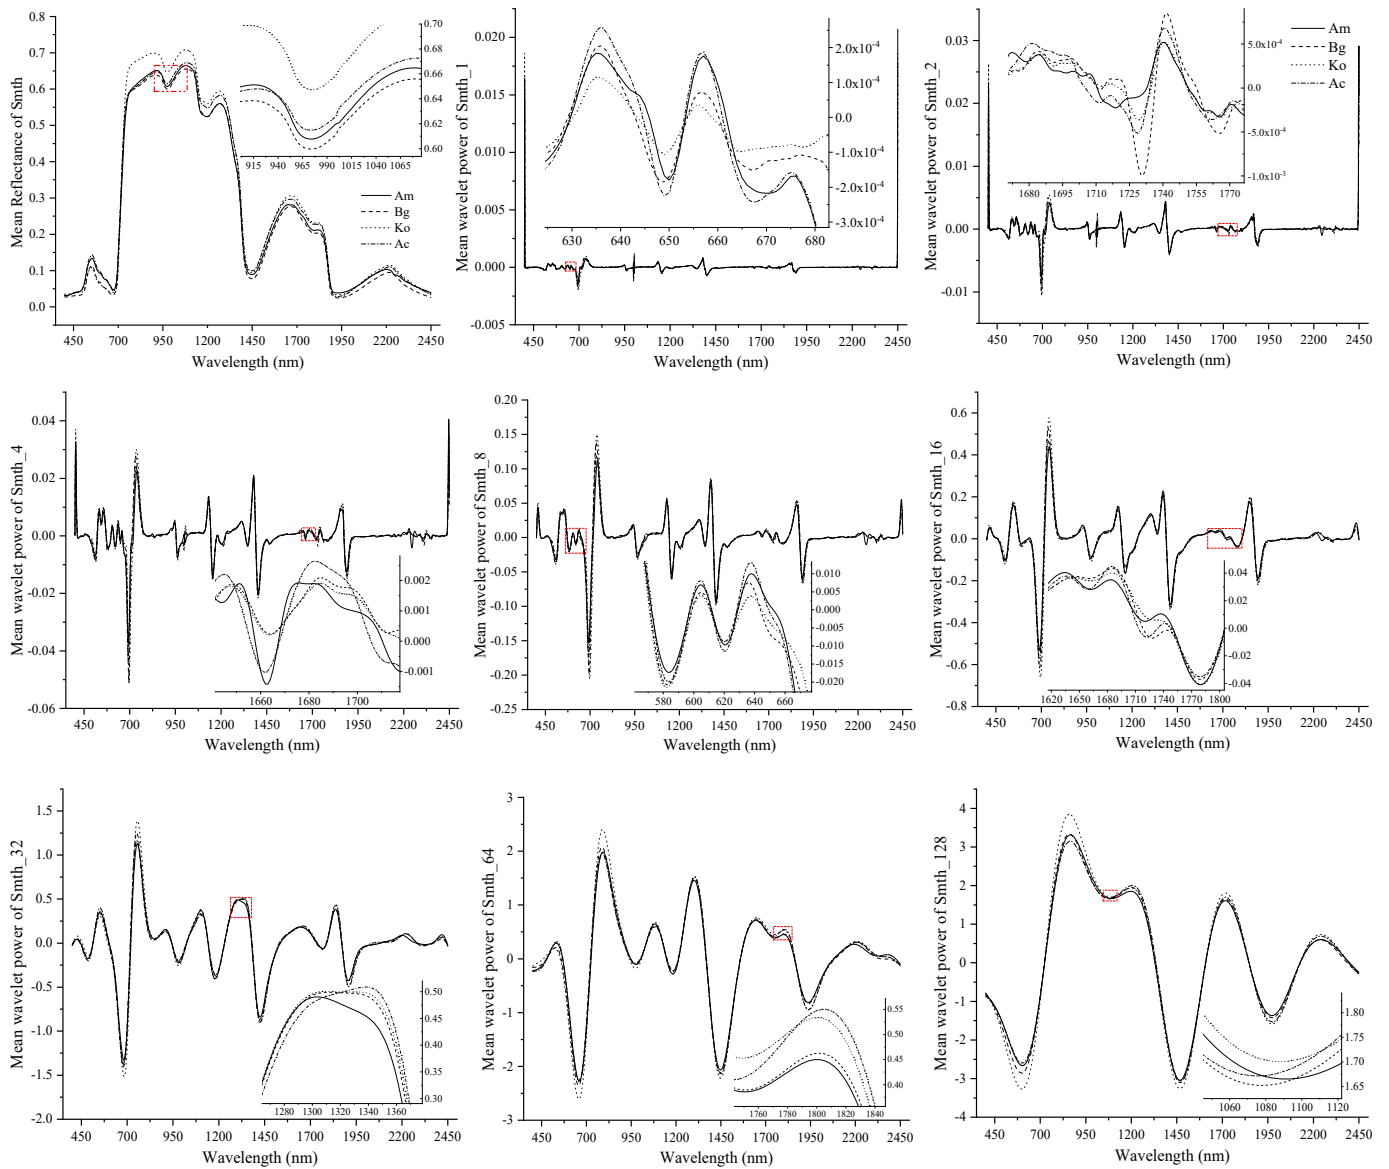

Figure S1-1. Mean reflectance and wavelet power spectra of Smth

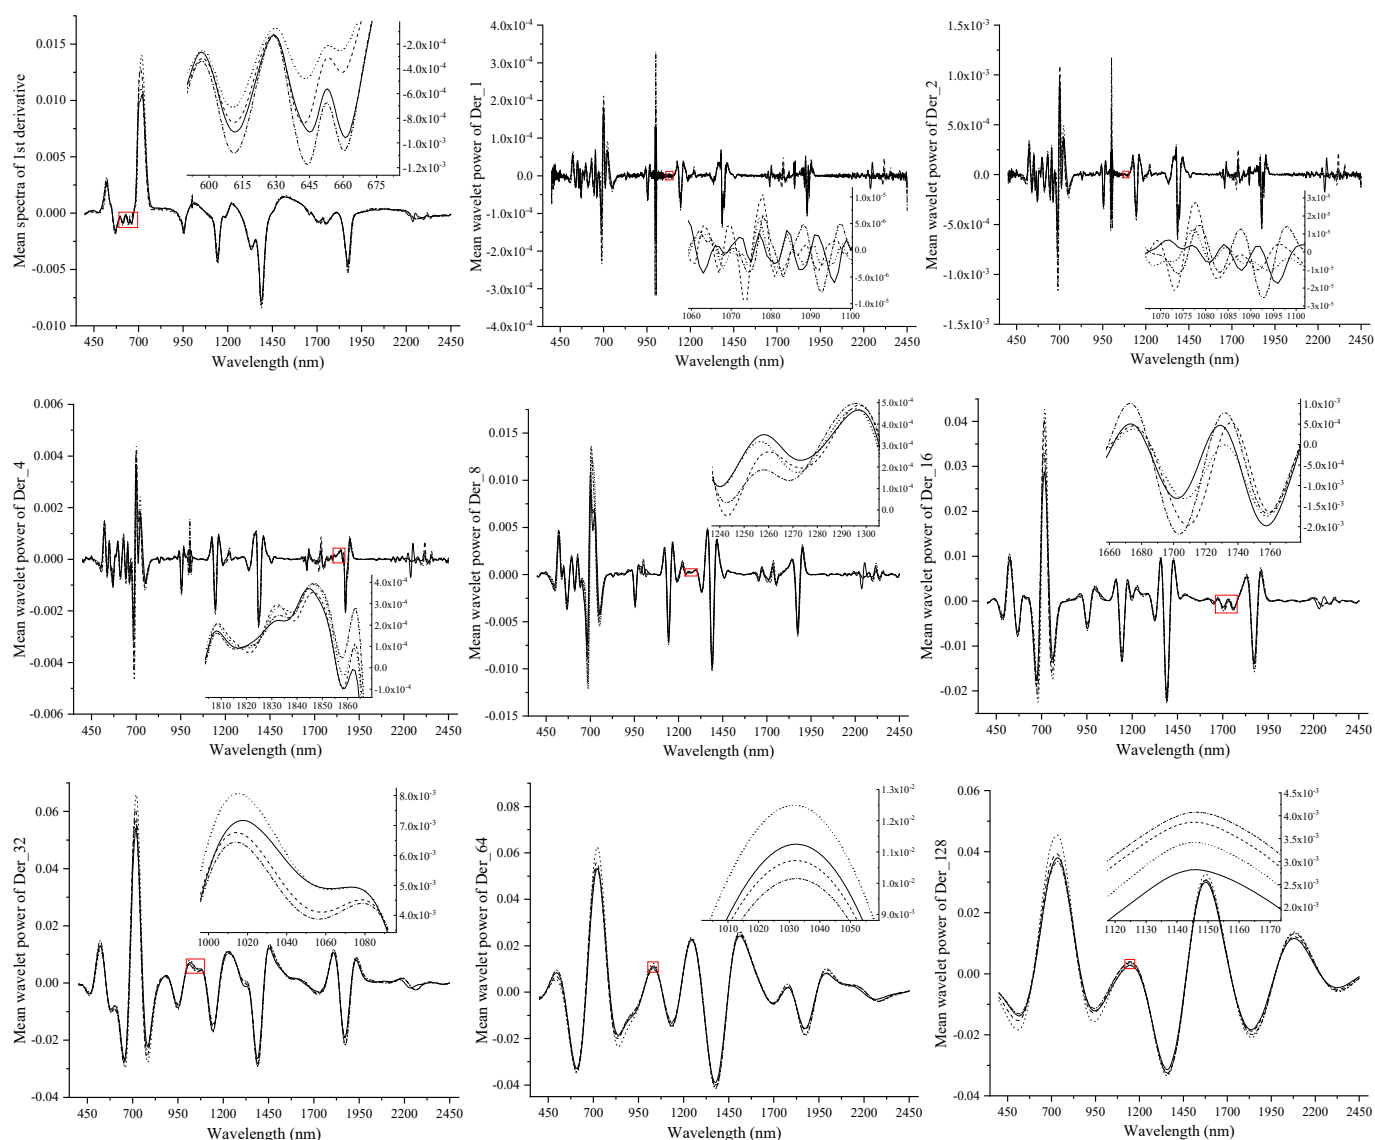

Figure S1-2. Mean reflectance and wavelet power spectra of Der

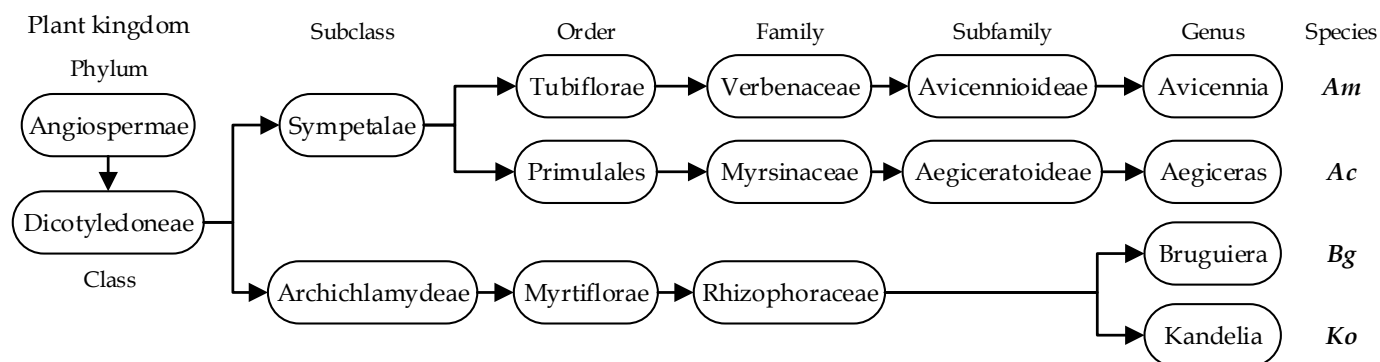

Figure S1-3. Taxonomic hierarchy of the four mangrove species.

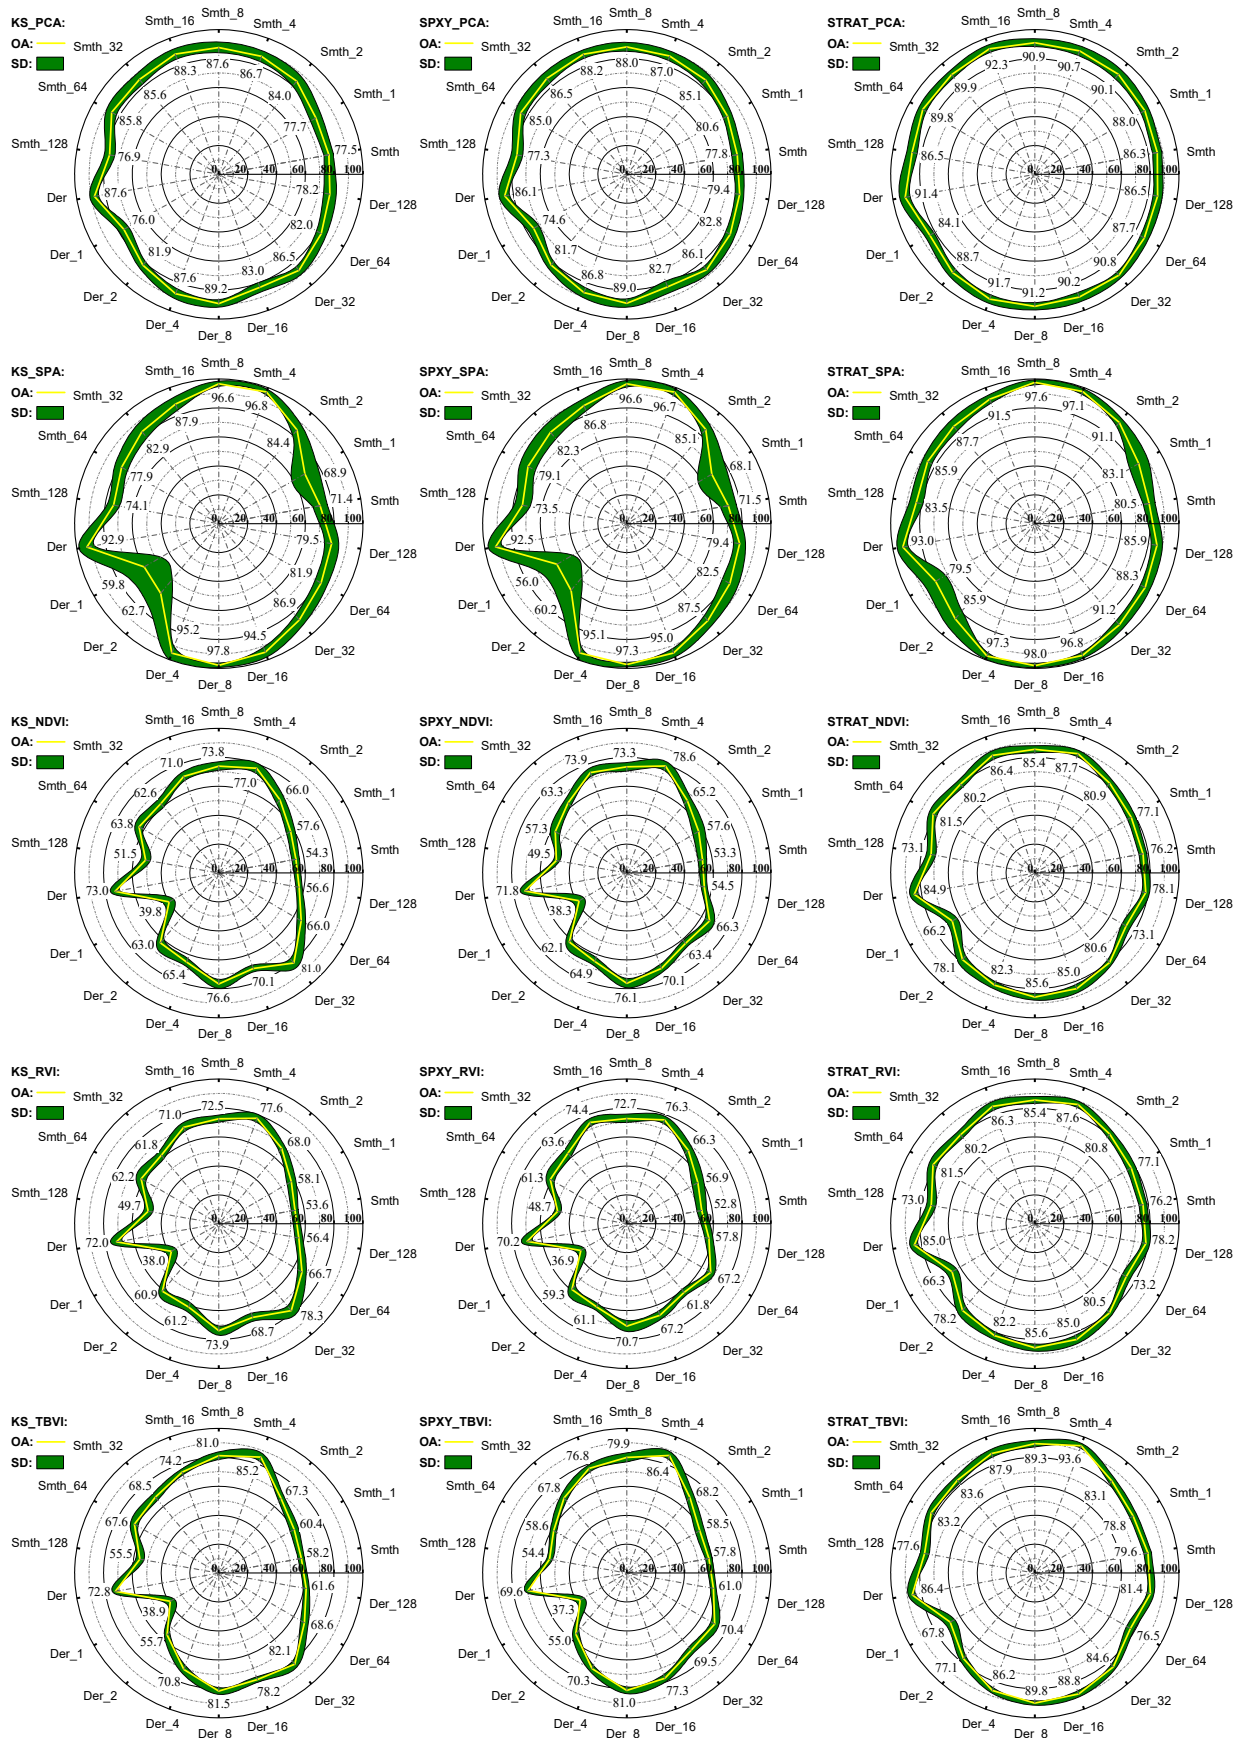

Figure S1-4. The OAs (yellow line) and  $\pm 1$  SD (olive-green buffer area) of all spectra

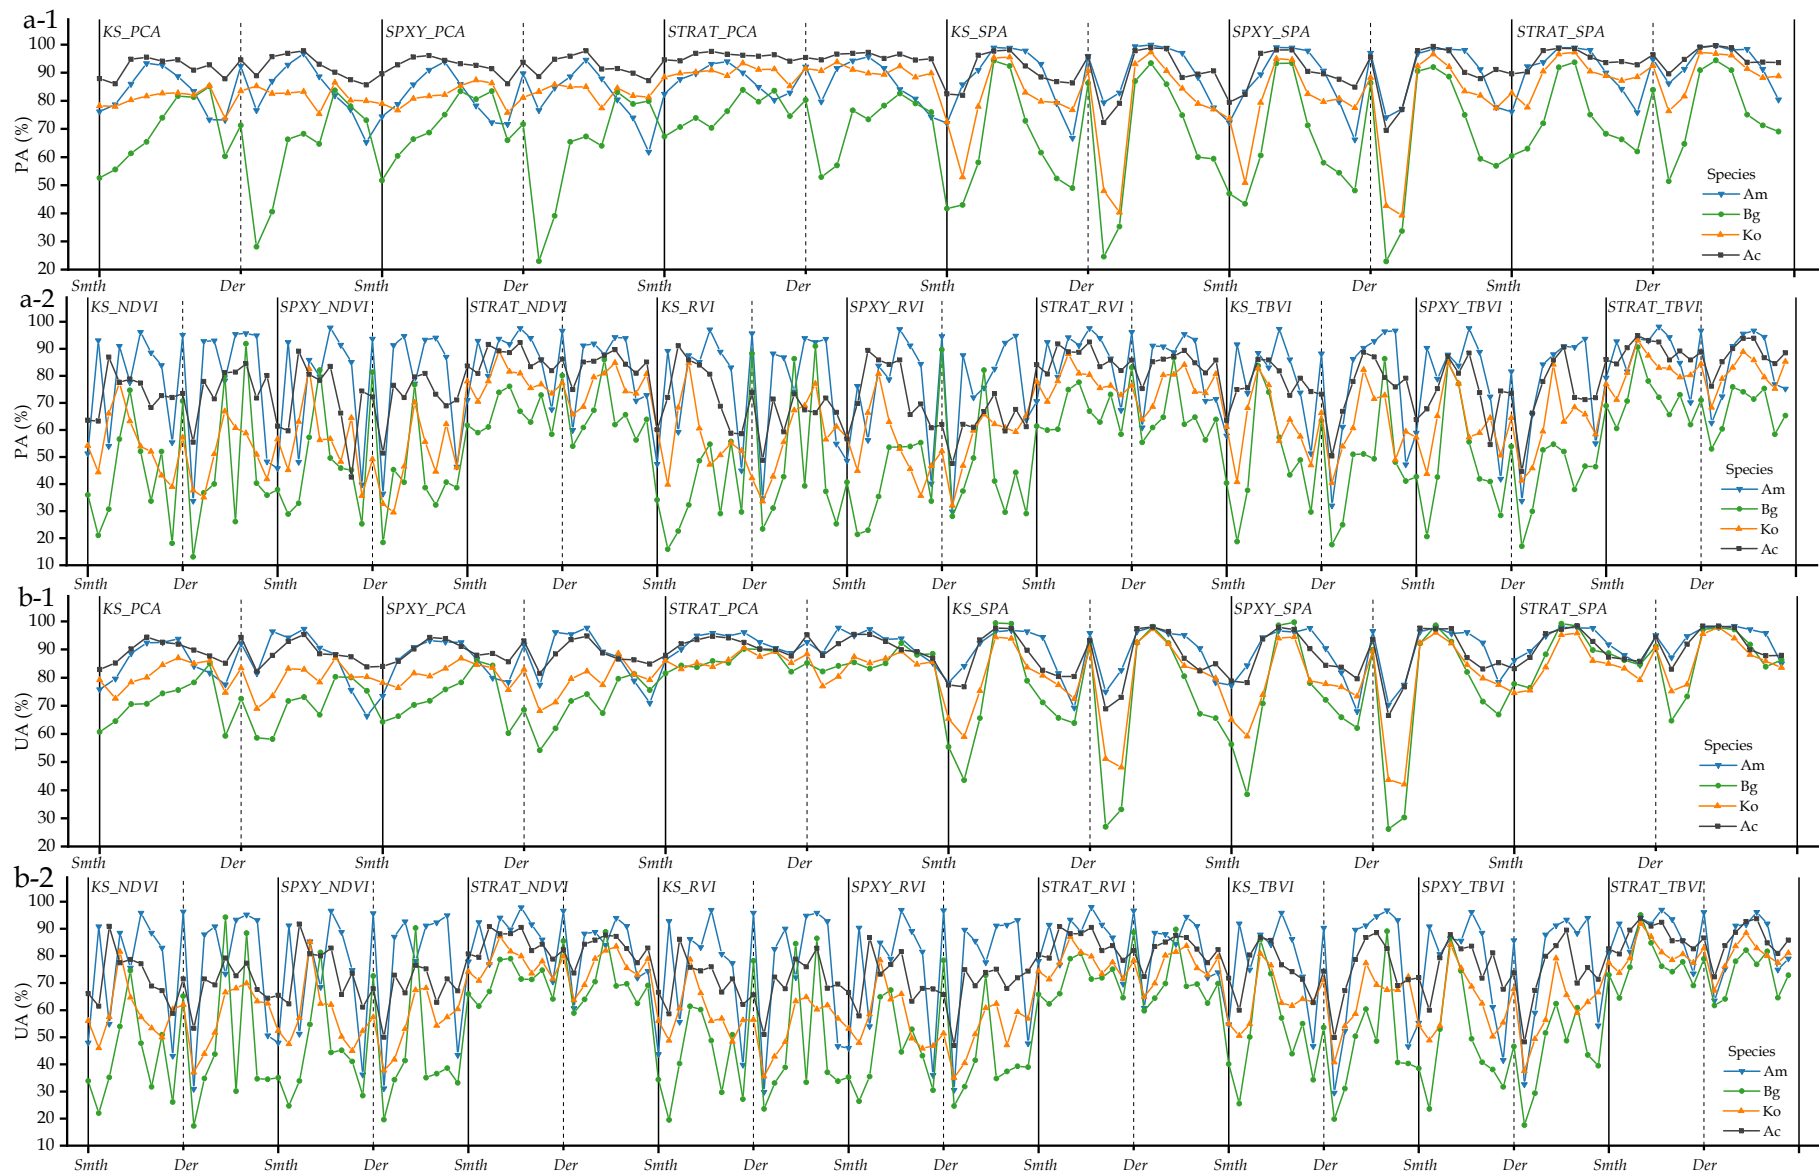

Figure S1-5. Plots of PAs (a-1 and a-2) as and UAs (b-1 and b-2) of four species derived from the 270 classification models. The horizontal axis represents the reflectance spectra (Smth), wavelet power spectra of Smth with eight scales (Smth\_1, Smth\_2, ..., Smth\_128), derivative spectra (Der) and wavelet power spectra of Der with eight scales (Der\_1, Der\_2, ..., Der\_128). A total of 15 combinations (three subset partition methods and five feature extraction methods) are plotted.
